# Supplementary material for: Elevation of CD40/CD40L Inflammatory Pathway Molecules in Carotid Plaques from Moderate-and-Severe Obstructive Sleep Apnea Patients
Source: MDPI journal article supplement (doi:10.3390/diagnostics11060935), 2021-05-22
Supplement: s1 [file s1]

## Supplementary Materials

**Table S1.** Patient demographic data and home sleep apnea test (HSAT) results in 4 groups of patients divided according to pAHI.

|                         | Control     | Mild         | Moderate      | Severe         |
|-------------------------|-------------|--------------|---------------|----------------|
| Cases, n                | 14          | 13           | 11            | 8              |
| Age, years              | 71.4 ± 8.1  | 73.8 ± 7.2   | 74.3 ± 11.2   | 73.4 ± 8.3     |
| Female/Male, n          | 9/5         | 7/6          | 3/8           | 3/5            |
| BMI, kg/m <sup>2</sup>  | 26.0 ± 2.7  | 26.8 ± 2.8   | 28.6 ± 3.6    | 31.3 ± 3.5*    |
| Neck circumference, cm  | 37.4 ± 3.9  | 38.6 ± 3.9   | 39.5 ± 2.2    | 42 ± 2.5*      |
| Waist circumference, cm | 97.7 ± 11.3 | 97.6 ± 6.5   | 100.3 ± 13.4  | 110.8 ± 6.8*   |
| pAHI, events/h          | 3.6 ± 1.3   | 9.0 ± 2.2*** | 21.7 ± 3.1*** | 43.5 ± 13.3*** |
| ODI                     | 1.3 ± 0.6   | 3.5 ± 1.7*** | 13.5 ± 4.5*** | 33.1 ± 9.3***  |
| ESS score               | 3.4 ± 1.5   | 7.5 ± 8.1    | 7.8 ± 4.8*    | 8.7 ± 6.2**    |

\* $p < 0.05$ , \*\*  $p < 0.001$ , \*\*\*  $p < 0.0001$  versus control (Student's  $t$ -test); BMI: body mass index; pAHI: peripheral arterial tone apnea/hypopnea index; ODI: oxygen desaturation index; ESS: Epworth sleepiness scale. This table was previously published in *Sleep and Breathing*, Springer Journal, doi: 10.1007/s11325-020-02029-w. and is available by Creative Commons CC-BY license.

**Table S2.** Level of atherosclerosis markers in two groups of obstructive sleep apnea patients: control/mild and moderate/severe.

|       | Control<br>(n = 14) |      | Mild<br>(n = 13) |      | Moderate<br>(n = 11) |      | Severe<br>(n = 8) |      |      |       |          |
|-------|---------------------|------|------------------|------|----------------------|------|-------------------|------|------|-------|----------|
|       | M                   | SD   | M                | SD   | M                    | SD   | M                 | SD   | F    | $p$   | $\eta^2$ |
| MCP-1 | 0.18                | 0.40 | 0.23             | 0.44 | 0.70                 | 0.95 | 1.00              | 0.93 | 2.71 | 0.070 | 0.20     |
| CD40  | 0.45                | 0.69 | 0.46             | 0.66 | 0.80                 | 0.79 | 1.00              | 0.76 | 1.35 | 0.273 | 0.10     |
| MMP-9 | 2.27                | 1.01 | 2.23             | 1.09 | 2.30                 | 1.16 | 2.63              | 0.74 | 0.27 | 0.845 | 0.02     |
| CD40L | 0.27                | 0.90 | 0.54             | 1.13 | 0.70                 | 1.06 | 0.88              | 1.13 | 0.57 | 0.640 | 0.04     |

OSA—obstructive sleep apnea; M—mean; SD—standard deviation;  $t$ —Student's  $t$ -test;  $p$ —significance value;
